# Supplementary material for: Vesicles fabricated by hybrid nanoparticles
Source: Royal Society of Chemistry journal article supplement (doi:10.1039/b906967d), 2009-01-01
Supplement: b906967d.pdf [file b906967d.pdf]

## Electronic Supplementary Information for Vesicles Fabricated by Hybrid Nanoparticles

Xiwen Zhang, Yongfang Yang, Jia Tian and Hanying Zhao\*

5 **Materials:** 4,4'-Azobis(4-cyanopentanoic acid) (ABCPA, Aldrich, 97%) was recrystallized from methanol and dried under vacuum at room temperature. Styrene was purchased from KRS FINE CHEMICAL CO. LT. and purified by distillation at reduced pressure prior to use.  $\text{FeCl}_3 \cdot 6\text{H}_2\text{O}$ ,  $\text{FeCl}_2 \cdot 4\text{H}_2\text{O}$ , 1.2M HCl  
10 solution and NaOH were purchased from Tianjin agent company and used as received. All the solvents were distilled before use. PS with pendant AuNPs were synthesized as reported previously.<sup>1</sup>

**Measurements:** The apparent molecular weights and molecular  
15 weight distributions of the polymers were determined at 35 °C on a gel permeation chromatograph (GPC) equipped with a Waters 717 autosampler, Waters 1525 HPLC pump, three Waters Ultra Styragel columns with 5K-600K, 500-30K, and 100-10K molecular ranges, and a Waters 2414 refractive index detector.  
20 THF was used as the eluent at a flow rate of 1.0 mL/min. The number average molecular weights (Mn) and the molecular weight distributions of the polymers were calibrated on polystyrene standards. Transmission electron microscopy (TEM) images were obtained on a Tecnai G2 20 S-TWIN electron  
25 microscope equipped with a Model 794 CCD camera (512×512) at an operating voltage of 200 kV. Atom force microscopy (AFM) measurements were performed with a multi Model atomic force microscope (Digital Instrumental Nanscope IV) on a fresh mica surface in the tapping mode at room temperature in air. The  
30 samples were prepared by spin-coating a drop of dilute aqueous solution onto a fresh mica surface at room temperature. Thermogravimetric analysis (TGA) measurements were performed on a Netzsch TG 209 at a heating rate of 10K/min under nitrogen atmosphere.

35 **Preparation of PS-coated  $\text{Fe}_3\text{O}_4$  nanoparticles:**  $\text{Fe}_3\text{O}_4$  nanoparticles with hydroxyl groups on the surface were prepared according to the literature.<sup>2</sup>  $\text{FeCl}_3 \cdot 6\text{H}_2\text{O}$  (2.16 g, 7.99 mmol) and  $\text{FeCl}_2 \cdot 4\text{H}_2\text{O}$  (0.835 g, 4.20 mmol) were added into 6.50 mL of deoxidized HCl solution (0.411M) under an argon atmosphere at  
40 stirring. The resulted solution was added dropwise into 82.5 mL of NaOH solution (1.50 M) under rigorous stirring. The solution was stirred for 30 min, and then centrifuged at 8000 rpm for 2 min. Dark  $\text{Fe}_3\text{O}_4$  nanoparticles powder was filtered, washed by deoxidized doubly-distilled water, and dried in vacuum.

45  $\text{Fe}_3\text{O}_4$  nanoparticles coated with ABCPA: An acetone solution (20 ml) containing the  $\text{Fe}_3\text{O}_4$  nanoparticles (1 g) was combined with ABCPA (1.3 g, 4.64 mmol) under argon atmosphere. The  $\text{Fe}_3\text{O}_4$  nanoparticles were dispersed under ultrasonic at room temperature for 1.5 h. The solution was  
50 centrifuged at 8000 rpm for 5 min, and the dark-brown  $\text{Fe}_3\text{O}_4$  nanoparticles were filtered, washed by  $\text{CH}_2\text{Cl}_2$ , and dried in vacuum.

$\text{Fe}_3\text{O}_4$  nanoparticles coated with polystyrene:  $\text{Fe}_3\text{O}_4$  nanoparticles coated with ABCPA (8 mg) were dispersed in  
55 toluene (2 mL) under ultrasonic, and then styrene (2 mL) was

added. The solution was bubbled with argon for 30 min, and the polymerization was conducted at 80 °C for 12 h. The PS-coated  $\text{Fe}_3\text{O}_4$  nanoparticles were precipitated in methanol and centrifuged at 8000 rpm for 5 min. In order to remove free polystyrene, the hybrid nanoparticles were redispersed in 5 mL of chloroform and centrifugated, and the hybrid nanoparticles at the bottom of vials were collected. A drop of the PS-coated  $\text{Fe}_3\text{O}_4$  nanoparticles dispersion in chloroform was casted on a TEM grid and allowed to dry, and then TEM measurement was conducted.  
65 The average size of PS-coated  $\text{Fe}_3\text{O}_4$  nanoparticles determined by TEM was about 8 nm (Figure S1). The number-average molecular weight and molecular weight distribution of PS were 161K and 2.48, respectively. TGA measurements (Figure S2) for free-radical initiator modified  $\text{Fe}_3\text{O}_4$  and PS-coated  $\text{Fe}_3\text{O}_4$   
70 nanoparticles were found to have 17 wt% and 28 wt% volatile materials, so the weight percentage of PS on  $\text{Fe}_3\text{O}_4$  nanoparticles was about 11 wt%.

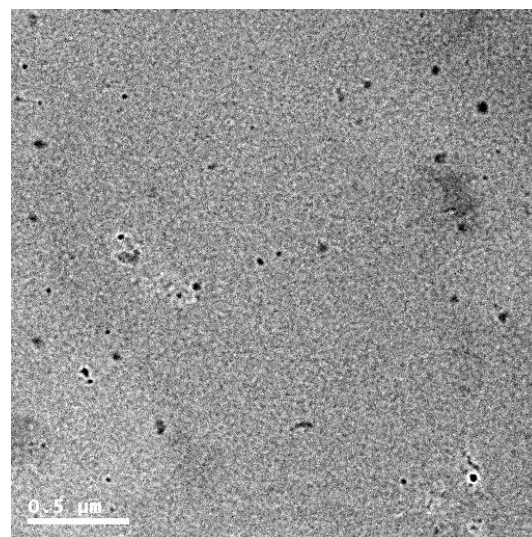

75 **Figure S1.** A TEM image of  $\text{Fe}_3\text{O}_4$  nanoparticles coated with polystyrene in THF solution.

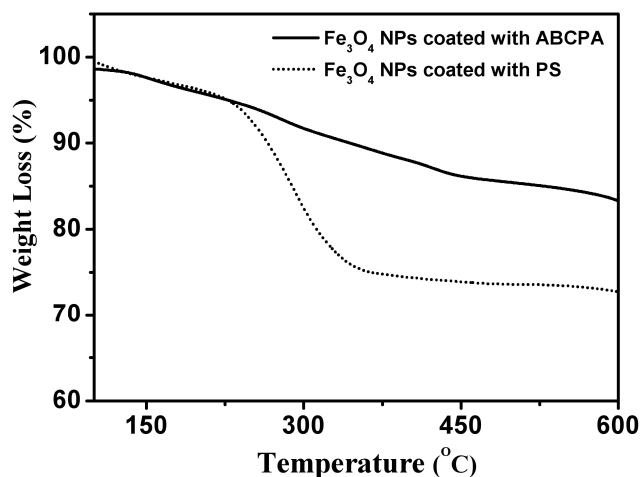

**Figure S2.** TGA curves for free-radical initiator modified Fe<sub>3</sub>O<sub>4</sub> and PS-coated Fe<sub>3</sub>O<sub>4</sub> nanoparticles.

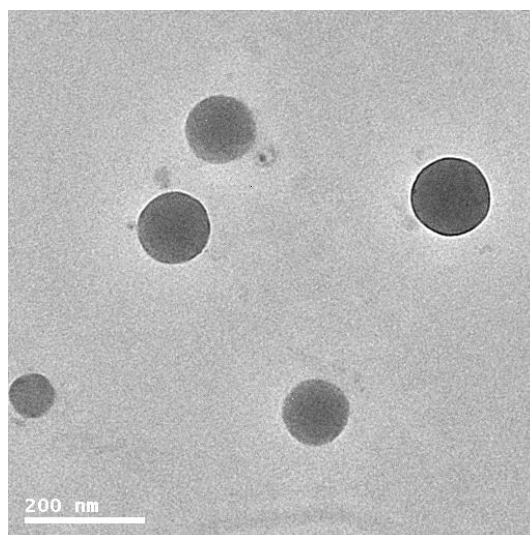

**Figure S4.** A TEM image showing the micellar structures of PS-AuNPs in water.

5 **Preparation of vesicles:** THF solutions of PS with pendant AuNPs and PS-coated Fe<sub>3</sub>O<sub>4</sub> nanoparticles were mixed under ultrasonic at room temperature. Then 7-fold of deionized water was added dropwise to the solution of the mixture under ultrasonic at room temperature. In order to remove THF, the  
 10 solution was dialyzed against water.

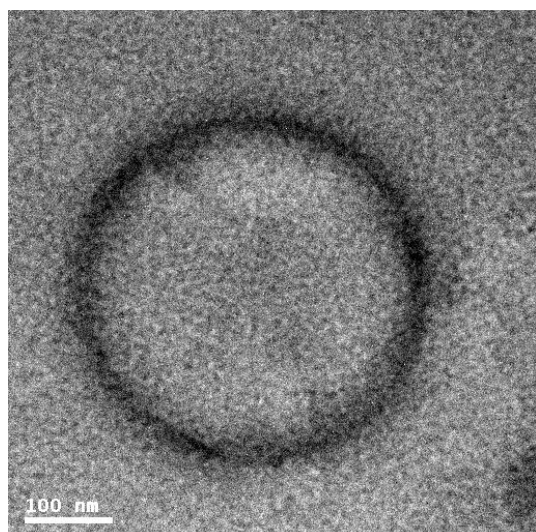

**Figure S3.** A magnified TEM image of a typical vesicle showing details of the structure.

## 20 references

1. X. Zhang, L. Liu, J. Tian and H. Zhao, *Chem. Commun.*, 2008, **48**, 6549.
2. Y. S. Kang, S. Risbud, J. F. Rabolt and P. Stroeve, *Chem. Mater.*, 1996, **8**, 2209.
